# Supplementary material for: Noncoding variants alter GATA2 expression in rhombomere 4 motor neurons and cause dominant hereditary congenital facial paresis
Source: PubMed Central journal article supplement (PMC10335940; doi:10.1038/s41588-023-01424-9), 2023-06-29

Source Data: Unprocessed EMSA blots from Figure 4k

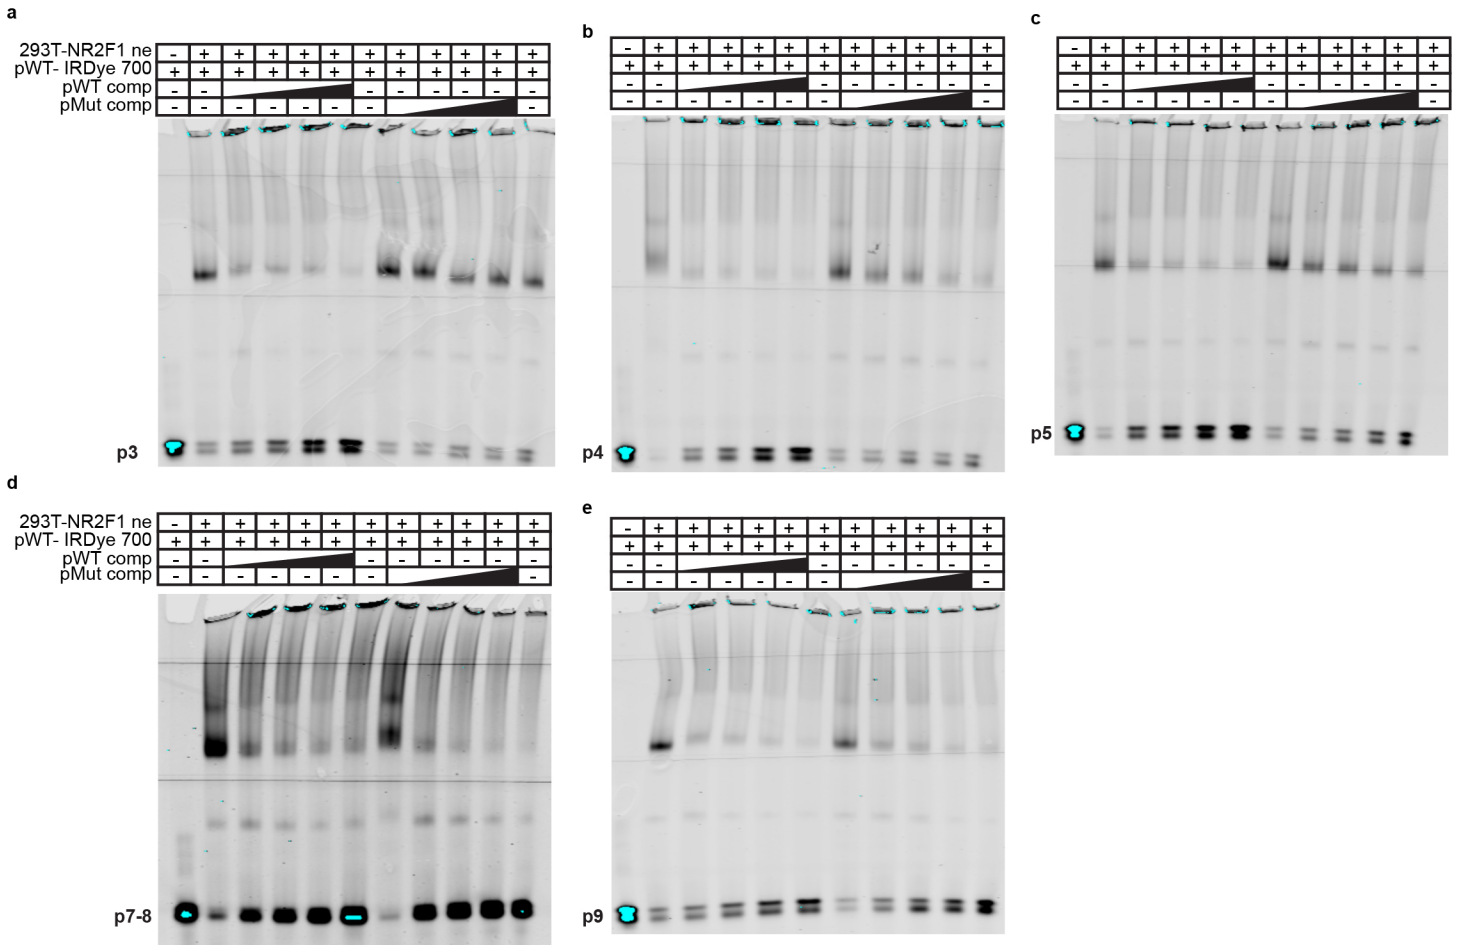

Supplement: 41588_2023_1424_MOESM5_ESM.pdf [file 41588_2023_1424_MOESM5_ESM.pdf]
